# Supplementary material for: Infusion of blood from young and old mice modulates amyloid pathology
Source: Aging (Albany NY). 2025 Sep 12;17(11):2664–87. doi: 10.18632/aging.206319 (PMC12705187; doi:10.18632/aging.206319)
Supplement: Supplementary Data 1 [file aging-17-11-206319-s002.xlsx]

## Sheet: GEX01 GEX02 vsCtrl
Supplementary Data 1. Ingenuity pathways analysis (IPA) data.
	Old Blood vs Ctrl		Young Blood vs Ctrl					GEX02
Gene name	logFC	P.Value	logFC	P.Value				GEX01
Usp31	7.85967	0.0106544	10.4043	0.00227723
Diras2	7.21083	0.0135637	7.04843	0.0151224
Ndrg3	6.52263	0.00563535	3.65627	0.0401168
Sh3gl3	6.19925	0.00920091	4.75869	0.0244978
Ank2	6.00351	0.0440772	6.75621	0.0122673
Epn2	5.84406	0.00168077	6.36975	0.00100997
Lpcat4	5.64369	0.0381525	7.03202	0.0145383
Dlg2	3.58952	0.0310281	4.67606	0.00939185
Mbp	3.11862	0.0438104	5.16194	0.0035073
Rpl36a	1.88779	0.0204415	2.03044	0.0151224
Alyref	1.53336	0.0143601	1.58109	0.0123717
C1qb	1.00856	0.0287656	0.960716	0.0346399
Ube2l3	-4.65037	0.0212529	-5.09801	0.0125596
Ly6h	-4.7974	0.0455578	-5.65018	0.0176384
Pls1	-4.81426	0.0350464	-4.53526	0.0477712
Cpeb2	-4.83203	0.0130278	-4.68474	0.0158829
Crmp1	-4.86087	0.0471895	-5.2027	0.0336929
Alg2	-5.05281	0.0367029	-4.88798	0.0428359
Nit2	-5.18962	0.0357927	-5.28674	0.0324189
Tpm4	-5.27515	0.0278968	-5.33758	0.0260305
Taldo1	-5.27701	0.0278715	-5.29283	0.0274799
Ppp1r9b	-5.29443	0.0307173	-5.54069	0.0245458
Ubqln1	-5.31105	0.0220519	-5.28584	0.0227043
Kbtbd11	-5.31619	0.030117	-5.20634	0.0333685
Glod4	-5.3179	0.032902	-5.09654	0.039831
Ndufa9	-5.32465	0.0300778	-5.2766	0.0313385
Abhd16a	-5.32793	0.0320441	-4.88865	0.0496242
Cluh	-5.34262	0.0170805	-4.63653	0.0386646
Pccb	-5.36017	0.0221433	-5.15464	0.027222
Faah	-5.3797	0.0222927	-5.69807	0.0153757
Gorasp2	-5.38287	0.0162569	-5.12368	0.0221857
Prdx1	-5.41869	0.0310394	-5.49052	0.0292591
Nop58	-5.44018	0.0154378	-5.55109	0.0134528
Tsnax	-5.44202	0.025398	-5.21411	0.0322918
Sptb	-5.45721	0.0256727	-5.59165	0.0227365
Fh	-5.46306	0.028875	-5.64137	0.0248917
Lrp1	-5.4672	0.0261372	-5.64315	0.0223139
Pip5k1c	-5.48199	0.0239896	-5.47312	0.0241894
Xpo7	-5.59545	0.0269006	-5.19617	0.0402156
Acaa1a	-5.6213	0.0243446	-5.36383	0.0313326
Pygm	-5.65293	0.0274869	-5.6067	0.0285801
Nit1	-5.67209	0.0189855	-5.49719	0.022976
Me3	-5.80599	0.023341	-6.05291	0.0186938
Prkar1b	-5.80819	0.0145415	-5.53461	0.0197526
Nt5c2	-6.92031	0.00145217	-8.03918	0.000385363
Bcam	-6.92614	0.004829	-6.15164	0.0123091
Gria1	-7.08892	0.03689	-6.81203	0.0462429
Bpnt1	-7.12605	0.000531809	-6.23747	0.00198128
Dnajc9	9.93919	0.000913248
Mapk9	7.99075	0.00165001
Armcx3	7.86781	0.00584052
Camk2a	7.84711	0.0103145
Mcee	7.63046	0.0038607
Tph2	7.56225	0.00756708
Cacna2d2	7.51934	0.00182516
Dpp6	7.32931	0.0166943
Snx32	7.23481	0.0077384
Gpt2	7.00769	0.00703173
Zfr	6.86764	0.00189473
Slc1a1	6.84282	0.00153308
Gm21985	6.77493	0.0324083
Serinc1	6.45787	0.00608774
Actn4	6.30562	0.00415109
Gng13	6.26732	0.0262399
Cntnap2	6.21845	0.0108007
Skiv2l	6.19887	0.0139264
Usp10	6.18779	0.0170791
Agpat5	6.13686	0.00229812
Slc27a1	6.07865	0.00240211
Dhrs7b	6.05138	0.0134084
Cpne2	6.03334	0.0265128
Ago2	6.01489	0.00570376
Inpp5j	5.82434	0.0232352
Daam2	5.70632	0.0257073
Spryd7	5.69851	0.00391448
Ank3	5.693	0.0339084
GOLGA7B	5.65278	0.0129946
Pde6d	5.64276	0.0397443
Rprd1b	5.60753	0.0218273
Srsf6	5.53914	0.0132742
Dagla	5.50689	0.0114427
Wdr77	5.49107	0.0117335
Lysmd2	5.41418	0.0141026
Vgf	5.36188	0.0386777
Hmgn3	5.31983	0.0447735
Nop56	5.25829	0.035687
Spag9	5.22563	0.0303334
Sf1	5.218	0.0314748
Mlst8	5.13152	0.0277694
Iqsec1	5.11663	0.0374075
Tra2a	5.03362	0.0471158
Mtco2	5.02695	0.0323826
Cul4b	5.0053	0.0096778
Epb41l3	5.00506	0.0336399
Lamtor2	4.99026	0.0401725
Gabarapl1	4.98966	0.0487513
Mat2a	4.96796	0.0372213
Tm9sf2	4.95427	0.013042
Camk2g	4.80143	0.0371301
Mtres1	4.80095	0.0375383
Hspa4l	4.7721	0.0404737
Trmt112	4.76895	0.0416249
Ppp1cb	4.74524	0.0460505
Sephs1	4.74465	0.036189
Csnk1g3	4.73186	0.0283798
Dip2a	4.70893	0.025157
Tnks1bp1	4.69561	0.0468034
Wars2	4.56153	0.0314067
Akap10	4.54322	0.0313015
Actr1a	4.54059	0.0494424
Opcml	4.53695	0.03337
Pex11b	4.52594	0.0122371
Tkt	4.48134	0.0485663
Pkp4	4.46255	0.0197955
Serpina3k	4.3847	0.0455245
Cpt2	4.37701	0.048595
Cul4a	4.32336	0.0494278
Braf	4.2482	0.0449606
Srsf2	4.03227	0.0400648
Scyl2	4.01988	0.033848
Tamm41	3.92888	0.0163704
Ap3s1	3.81673	0.0209206
Cpne9	3.54942	0.00445042
Bzw1	3.255	0.0317696
Vtn	2.90022	0.0308485
Dync1i1	1.93224	0.0431911
Syt5	1.70784	0.0495522
Gm1604b	-1.99575	0.0394599
Igsf8	-3.1057	0.0479743
Bcas3	-3.15964	0.0444264
Sh3bgrl2	-3.52176	0.0390998
Col4a1	-3.73729	0.0472513
Tbc1d10b	-3.82868	0.0466487
Luzp1	-4.1319	0.0490038
Naaa	-4.15862	0.0431959
Ahcyl2	-4.28211	0.0324741
Pex14	-4.5319	0.0312527
Skp1	-4.75432	0.0227671
Bcar1	-5.12043	0.043416
Glrx	-5.18811	0.0285221
C1qbp	-5.18843	0.0497935
Ccdc93	-5.25496	0.047433
Fech	-5.64147	0.0264426
Arhgef11	-5.7206	0.0170735
Gmds	-5.87304	0.0165613
Hist2h2bb	-6.05668	0.0488479
Acyp1	-6.36492	0.0127326
Isoc1	-7.17638	0.0156075
Rpl35a	-7.42269	0.00343081
Uqcrb	-7.9213	0.0128259
Ppp1r16b			8.86961	0.00649
Nudt4			8.85808	0.00935107
Syngap1			8.72397	0.00155113
Pdpk1			8.71416	0.000247008
Mrpl4			8.65608	0.00745974
Actl6a			8.04268	0.0162315
Lyplal1			7.70856	0.00460214
Castor2			7.30282	0.00282126
Rilpl1			7.2588	0.0118392
Itsn2			7.16975	0.0100824
Cfdp1			6.89234	0.00726955
Gpx4			6.83214	0.0258452
Acin1			6.72352	0.000832878
Eif1ax			6.55631	0.00120482
Ablim2			6.47635	0.0227799
Cask			6.32905	0.0325396
Sart1			6.32495	0.0188317
Gab1			6.27282	0.0214314
Dcxr			6.05946	0.00836102
Sumo2			5.957	0.0273162
Naca			5.94221	0.0188541
Mtmr2			5.81713	0.0320106
Pcsk1			5.81243	0.0225313
Smap			5.69259	0.00458
Ddx3x			5.66022	0.0329631
Cmpk2			5.57261	0.0257924
Atg2b			5.30393	0.0407127
Gstz1			5.17716	0.0325528
Them6			5.15028	0.0378076
Snrpg			5.10124	0.0436302
Brinp1			5.09733	0.00570095
Isyna1			5.04348	0.0339146
Gpsm1			4.95084	0.0367375
Vamp3			4.95056	0.0337149
Lamp2			4.94608	0.0290301
Scrn1			4.94353	0.0405205
Snrnp200			4.91249	0.0325774
Aldh9a1			4.90861	0.0434399
Ywhab			4.89784	0.041923
Tst			4.81594	0.049341
Sorbs1			4.78663	0.0132339
Ncam1			4.72625	0.0284357
Pld3			4.63701	0.0342555
Capn2			4.63654	0.0451407
Clip2			4.6302	0.0421128
Golga2			4.62692	0.0215399
Apmap			4.59597	0.0492846
Nrxn3			4.58885	0.0486272
Ykt6			4.57577	0.0485182
Pafah1b2			4.50232	0.0497022
Gtpbp1			4.48652	0.0223739
Them4			4.44408	0.0450965
Mtmr9			4.21772	0.0380394
Ufm1			4.19953	0.0290987
Fundc2			4.1662	0.0343606
Coasy			4.07749	0.0385368
Mrpl45			3.99597	0.011076
Psmc3			3.94618	0.0253717
Emd			3.9084	0.0132136
Esd			3.64657	0.0481496
Ric8a			3.57721	0.0322392
Cirbp			3.49986	0.0267065
Lamp1			3.49351	0.0313665
Cdh11			3.44903	0.0311615
Nipsnap3b			3.26645	0.0434601
Bri3bp			3.14309	0.02938
Spryd4			2.98507	0.0391489
Mff			2.9714	0.0354152
Stmn3			2.79778	0.0306151
Vdac1			2.70152	0.0200833
Fto			2.43632	0.0446441
Tma7			2.40335	0.0458428
Rps18-ps6			2.15875	0.0396372
Ntrk3			1.82075	0.049859
H1-2			1.75334	0.00834115
H1-5			1.49097	0.0297327
Uchl5			-1.89936	0.0331762
Pnp			-2.92992	0.0409434
Ptma			-3.08393	0.0375879
Nefm			-3.09322	0.0484435
Rangap1			-4.11297	0.0401183
Stx8			-4.31103	0.0400806
Bag5			-4.41509	0.0410151
Pgbd5			-4.91878	0.0388694
Dusp15			-4.94325	0.0405172
Rab6b			-5.00049	0.0327419
Lztfl1			-5.04275	0.0345898
Gak			-5.1386	0.0395065
Aldh7a1			-5.19624	0.0451173
Grk2			-5.28518	0.0236342
Htra1			-5.3468	0.0467645
Hnrnpk			-5.35109	0.0400598
Atl2			-5.39845	0.0492815
Dnajb1			-5.45037	0.0375374
Pygl			-5.5548	0.0117607
Mettl7a1			-5.57494	0.0280375
Nup93			-5.79076	0.0445846
Gba2			-6.19988	0.0211585
Hdhd2			-6.20559	0.0488783
Glg1			-6.35764	0.0198702
Top1			-6.46692	0.00649924
C2cd5			-7.02101	0.0342854
Tuba4a			-7.27654	0.0181248
Svop			-7.54283	0.00400779
Akr1a1			-7.77008	0.0143532
Ncdn			-8.04048	0.00933095
